# Supplementary material for: Influence of network geometry on long-term morphodynamics of alluvial rivers
Source: Copernicus journal article supplement (doi:10.5194/esurf-13-1059-2025), 2025-10-22
Supplement: Supplementary file [file esurf-13-1059-2025-supplement-title-page.pdf › esurf-13-1059-2025-supplement-title-page.pdf]

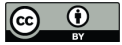

*Supplement of*

**Influence of network geometry on long-term morphodynamics of alluvial rivers**

**Fergus McNab et al.**

*Correspondence to:* Fergus McNab ([fergus.mcnab@gfz.de](mailto:fergus.mcnab@gfz.de))

- [esurf-13-1059-2025-supplement-title-page.pdf](#)
- [Supplementary\\_Figures\\_S1-S28.pdf](#)
- [Video\\_Supplement\\_Network\\_Example.gif](#)

The copyright of individual parts of the supplement might differ from the article licence.
